# Supplementary material
Source: ML conference proceedings conference paper supplement (https://openreview.net/forum?id=Xu8aG5Q8M3)
Supplement: supplementary_material [file attachment]

---

# Supplementary Material for LayoutGPT: Compositional Visual Planning and Generation with Large Language Models

---

Anonymous Author(s)

Affiliation

Address

email

## 1 A Implementation Details

2 In this section, we provide a detailed description of our prompt construction and instantiate instruc-  
3 tions examples.

4 **Task instructions** As is shown in Table 1, the specific task instructions start with verbalized de-  
5 scriptions of the task and are followed by the formal definition of the CSS style. As for the indoor  
6 scene synthesis, we additionally provide a list of available furniture and the normalized frequency  
7 distribution for fair comparisons with the supervised method. Yet we discover that the provided  
8 frequency distribution has little effect on the generation results, based on the trivial change in the KL  
9 divergence. In some cases, it is important to make LLMs sample from a defined distribution instead  
10 of learning the distribution from in-context exemplars, which we leave for future work.

Table 1: The prepending instructions provided to GPT-3.5/4 during our LayoutGPT’s 2D and 3D layout planning process. The instructions listed here are for the setting with CSS structure and with normalization.

| Task               | Instruction for GPT-3.5/4                                                                                                                                                                                                                                                                                                                                                                                                                                                                                                                                                                                                                                                                                                                                                                                                                                                                                                                                                                                                                                                                                                                                                                                                                            |
|--------------------|------------------------------------------------------------------------------------------------------------------------------------------------------------------------------------------------------------------------------------------------------------------------------------------------------------------------------------------------------------------------------------------------------------------------------------------------------------------------------------------------------------------------------------------------------------------------------------------------------------------------------------------------------------------------------------------------------------------------------------------------------------------------------------------------------------------------------------------------------------------------------------------------------------------------------------------------------------------------------------------------------------------------------------------------------------------------------------------------------------------------------------------------------------------------------------------------------------------------------------------------------|
| 2D Layout Planning | <p>Instruction:<br/>Given a sentence prompt that will be used to generate an image, plan the layout of the image. The generated layout should follow the CSS style, where each line starts with the object description and is followed by its absolute position.<br/>Formally, each line should be like "object {width: ?px; height: ?px; left: ?px; top: ?px; }". The image is 64px wide and 64px high. Therefore, all properties of the positions should not exceed 64px, including the addition of left and width and the addition of top and height.</p>                                                                                                                                                                                                                                                                                                                                                                                                                                                                                                                                                                                                                                                                                         |
| 3D Layout Planning | <p>Instruction:<br/>Synthesize the 3D layout of an indoor scene from the bottom-up view. The generated 3D layout should follow the CSS style, where each line starts with the furniture category and is followed by the 3D size, orientation, and absolute position.<br/>Formally, each line should follow the template: FURNITURE {length: ?px; width: ?px; height: ?px; left: ?px; top: ?px; depth: ?px; orientation: ?degrees;} All values are in pixels but the orientation angle is in degrees.</p> <p>Available furniture: armchair, bookshelf, cabinet, ceiling_lamp, chair, children_cabinet, coffee_table, desk, double_bed, dressing_chair, dressing_table, floor_lamp, kids_bed, nightstand, pendant_lamp, shelf, single_bed, sofa, stool, table, tv_stand, wardrobe<br/>Overall furniture frequencies: (armchair: 0.0045; bookshelf: 0.0076; cabinet: 0.0221; ceiling_lamp: 0.062; chair: 0.024; children_cabinet: 0.0075; coffee_table: 0.0013; desk: 0.0172; double_bed: 0.1682; dressing_chair: 0.0063; dressing_table: 0.0213; floor_lamp: 0.0093; kids_bed: 0.0079; nightstand: 0.2648; pendant_lamp: 0.1258; shelf: 0.0086; single_bed: 0.0211; sofa: 0.0018; stool: 0.012; table: 0.0201; tv_stand: 0.0308; wardrobe: 0.1557)</p> |

11 **Base LLMs** We use four variants of GPT models, (1) Codex [2] (`code-davinci-002`), an LLM  
 12 that is fine-tuned with large-scale code datasets and can translate natural language into functioning  
 13 code snippets; (2) GPT-3.5 [8] (`text-davinci-003`), which is trained to generate text or code  
 14 from human instructions; (3) GPT-3.5-chat (`gpt-3.5-turbo`) and (4) GPT-4 [7] (`gpt-4`), which  
 15 are both optimized for conversational tasks. For the last two models, we first feed the in-context  
 16 exemplars as multiple turns of dialogues between the user and the model to fit into the API design.  
 17 However, we generally observe that GPT-3.5-chat and GPT-4 are not as strong as GPT-3.5 in learning  
 18 from the in-context demonstrations, especially when the dialogue format follows a certain structure  
 19 instead of free-form descriptions.

20 **Hyperparameters** For all LLMs, we fix the sampling temperature to 0.7 and apply no penalty to  
 21 the next token prediction. For image layouts evaluation in main paper Table 2, we fix the number  
 22 of exemplars to 16 for numerical reasoning, and 8 for spatial reasoning, based on the best results of  
 23 a preliminary experiment. However, we do not observe significant gaps in evaluation results when  
 24 using different amounts of exemplars (see Sec. B.4). For each prompt, we generate five different  
 25 layouts/images using baselines or LayoutGPT and thus result in 3810 images for numerical reasoning  
 26 and 1415 images for spatial reasoning in all reported evaluation results. As for indoor scene synthesis,  
 27 we fix the number of exemplars to 8 for bedrooms and 4 for living rooms to reach the maximum  
 28 allowed input tokens. We set the maximum output token as 512 for bedrooms and 1024 for living  
 29 rooms as bedrooms have  $\sim 5$  objects per room while living rooms have  $\sim 11$  objects per room. We  
 30 generate one layout for each rectangular floor plan for evaluation.

## 31 B LayoutGPT for 2D Layout Planning

### 32 B.1 NSR-1K Benchmark Construction

33 We rely on the MSCOCO annotations to create NSR-1K with ground-truth layout annotations. Note  
 34 that each image in COCO is paired with a set of captions and a set of bounding box annotations.

35 **Numerical Reasoning** We primarily focus on the competence of T2I models to count accurately,  
 36 i.e., generate the correct number of objects as indicated in the input text prompt. The prompts for  
 37 this evaluation encompass object counts ranging from 1 to 5. To design the template-based T2I  
 38 prompts, we initially sample possible object combinations within an image based on the bounding  
 39 box annotations. We only use the bounding box annotation of an image when there are at most two  
 40 types of objects within the image. As a result, the template-based prompts consist of three distinct  
 41 types: (1) *Single Category*, wherein the prompt references only one category of objects in varying  
 42 numbers; (2) *Two Categories*, wherein the prompt references two categories of distinct objects in  
 43 varying numbers; and (3) *Comparison*, wherein the prompt references two categories of distinct  
 44 objects but specifies the number of only one type of object, while the number of the other type is  
 45 indicated indirectly through comparison terms including “fewer than”, “equal number of”, and “more  
 46 than”. As for natural prompts, we select COCO captions containing one of the numerical keywords  
 47 from “one” to “five” and filter out those with bounding box categories that are not mentioned to avoid  
 48 hallucination.

49 **Spatial Reasoning** We challenge LLMs with prompts that describe the positional relations of  
 50 two or more objects. Our spatial reasoning prompts consist of template-based prompts and natural  
 51 prompts from COCO. To construct template-based prompts, we first extract images with only two  
 52 ground-truth bounding boxes that belong to two different categories. Following the definitions from  
 53 PaintSkill [3], we ensure the spatial relation of the two boxes belong to (*left*, *right*, *above*,  
 54 *below*). Specifically, given two objects  $A, B$ , their bounding box centers  $(x_A, y_A), (x_B, y_B)$  and  
 55 the Euclidean distance  $d$  between two centers, we define their spatial relation  $\text{Rel}(A, B)$  as:

$$\text{Rel}(A, B) = \begin{cases} B \text{ above } A & \text{if } \frac{y_B - y_A}{d} \geq \sin(\pi/4) \\ B \text{ below } A & \text{if } \frac{y_B - y_A}{d} \leq \sin(-\pi/4) \\ B \text{ on the left of } A & \text{if } \frac{x_B - x_A}{d} < \cos(3\pi/4) \\ B \text{ on the right of } A & \text{if } \frac{x_B - x_A}{d} > \cos(\pi/4) \end{cases} \quad (1)$$

56 The definition basically dissects a circle centered at  $A$  equally into four sectors that each represent  
 57 a spatial relation. While the definition may not stand for all camera viewpoints, it allows us to

58 mainly focus on the **front view** of the scene. Then, we utilize the category labels and the pre-defined  
 59 relations to form a prompt, as is shown in main paper Table 1. As for the natural COCO prompts,  
 60 we select prompts that contain one of the key phrases (the left/right of, on top of,  
 61 under/below) and ensure that the bounding box annotations align with our definition.

## 62 B.2 Evaluation Metrics

63 We denote the set of  $n$  object categories in the ground truth annotation as  $\mathcal{C}_{GT} = c_1, c_2, \dots, c_n$ ,  
 64 where  $x_{c_1}, x_{c_2}, \dots, x_{c_n}$  represent the number of objects for each category. Additionally, we denote  
 65 the set of  $m$  object categories mentioned in GPT-3.5/4’s layout prediction as  $\mathcal{C}_{pred} = c'_1, c'_2, \dots, c'_m$ ,  
 66 where  $x'_{c'_1}, x'_{c'_2}, \dots, x'_{c'_m}$  represent the number of objects for each category accordingly. If a category  
 67  $c_i$  is not mentioned in  $\mathcal{C}_{pred}$ , then  $x'_{c_i}$  is assigned a value of 0, and vice versa.

| Categories   | $c_i$       | cat | bed | pillow |
|--------------|-------------|-----|-----|--------|
| Ground Truth | $x_{c_i}$   | 2   | 1   | 2      |
| Prediction   | $x'_{c'_i}$ | 1   | 0   | 3      |

$$precision = \frac{\sum \min(x_{c_i}, x'_{c'_i})}{\sum x'_{c'_i}} = \frac{1 + 0 + 2}{1 + 0 + 3} = 75\%$$

$$recall = \frac{\sum \min(x_{c_i}, x'_{c'_i})}{\sum x_{c_i}} = \frac{1 + 0 + 2}{2 + 1 + 2} = 60\%$$

Figure 1: An closeup example of how we compute the layout automatic evaluation metrics for numerical reasoning.

68 The numerical reasoning ability of GPT-3.5/4 on layout planning is assessed using the following  
 69 metrics: (1) *precision*: calculated as  $\frac{\sum_{k=1}^n \min(x_{c_k}, x'_{c'_k})}{\sum_{k=1}^m x'_{c'_k}}$ , is an indication of the percentage of predicted  
 70 objects that exist in the groundtruth; (2) *recall*: calculated as  $\frac{\sum_{k=1}^n \min(x_{c_k}, x'_{c'_k})}{\sum_{k=1}^n x_{c_k}}$ , indicates the percent-  
 71 age of ground-truth objects that are covered in the prediction; (3) *accuracy*: In the “comparison”  
 72 subtask, an accuracy score of 1 is achieved when the predicted relation, whether it is an inequality or  
 73 equality, between the two objects is accurately determined. For all other numerical subtasks, accuracy  
 74 equals to 1 if the predicted categories and object numbers precisely match the ground truth. In other  
 75 cases, the accuracy is 0. Fig. 1 shows an example of how we compute the *precision* and *recall*. The  
 76 *accuracy* for this single example is 0 since the predicted object distribution does not match the ground  
 77 truth in every category.

78 For spatial reasoning, we evaluate spatial accuracy based on the LLM-generated layouts and GLIP-  
 79 based layouts. We adopt [4] finetuned on COCO to detect involved objects from the generated  
 80 images and obtain the bounding boxes. For both types of layouts, we categorize the spatial relation  
 81 based on the above definition and compute the percentage of predicted layouts with the correct  
 82 spatial relation. For all evaluation benchmarks, we measure the CLIP similarity, which is the cosine  
 83 similarity between the generated image feature and the corresponding prompt feature.

## 84 B.3 GPT-3.5/4 Prompting

85 In main paper Sec. 4.4, we investigate the impact of three components in the structured prompts: (1)  
 86 *Instruction*, which examines whether detailed instructions explaining the task setup and the format  
 87 of the supporting examples are included in the prompt. (2) *Structure*, which evaluates the impact of  
 88 different formatting settings on the presentation of the bounding box aspects of height, width, top,  
 89 and left. The “w/ CSS” setting formats the aspects in CSS, while the “w/o CSS” setting presents the  
 90 four aspects in a sequence separated by a comma. (3) *Normalization*, which investigates the effects  
 91 of rescaling the bounding box aspects to a specified canvas size and presenting them as integers in  
 92 pixels in the “w/ Norm.” setting, while the “w/o Norm.” setting presents the aspects as relative scales  
 93 to the canvas size in floats that range from (0, 1).

94 Table 1 shows the detailed prepending instructions LayoutGPT provided to GPT-3.5/4 models during  
 95 2D layout planning. Table 2 compares the formats of supporting examples with ablated structures  
 96 and normalization settings.

Table 2: Closeup of various in-context example formats with ablated CSS structure and normalization for 2D layout planning.

| CSS Structure | Normalization | In-context Example Format Demo                                                                                                                                                         |
|---------------|---------------|----------------------------------------------------------------------------------------------------------------------------------------------------------------------------------------|
|               |               | Prompt: a teddy bear to the right of a book<br>Layout:<br>teddy bear: 0.50, 0.71, 0.50, 0.15<br>book: 0.50, 0.61, 0.00, 0.26                                                           |
| ✓             |               | Prompt: a teddy bear to the right of a book<br>Layout:<br>teddy bear {width: 0.50; height: 0.71; left: 0.50; top: 0.15; }<br>book {width: 0.50; height: 0.61; left: 0.00; top: 0.26; } |
|               | ✓             | Prompt: a teddy bear to the right of a book<br>Layout:<br>teddy bear: 32, 45, 31, 9<br>book: 31, 38, 0, 16                                                                             |
| ✓             | ✓             | Prompt: a teddy bear to the right of a book<br>Layout:<br>teddy bear {width: 32px; height: 45px; left: 31px; top: 9px; }<br>book {width: 31px; height: 38px; left: 0px; top: 16px; }   |

Table 3: The automatic metric scores of LayoutGPT (GPT-3.5) with different in-context sample selection approaches. All values are in percentage (%).

| # | Exemplar Selection | # In-Context Exemplars | Numerical Reasoning |         |                  |                | Spatial Reasoning |                |
|---|--------------------|------------------------|---------------------|---------|------------------|----------------|-------------------|----------------|
|   |                    |                        | Precision↑          | Recall↑ | Layout Accuracy↑ | GLIP Accuracy↑ | Layout Accuracy↑  | GLIP Accuracy↑ |
| 1 | Fixed Random       | 16                     | 64.83               | 92.71   | 87.66            | 47.10          | 80.14             | 47.07          |
| 2 |                    | 4                      | 88.93               | 95.02   | 76.17            | 50.20          | 85.30             | 51.66          |
| 3 | Retrieval          | 8                      | 93.32               | 95.63   | 82.68            | 50.58          | 82.54             | 52.86          |
| 4 |                    | 16                     | 94.81               | 96.49   | 86.33            | 51.25          | 82.40             | 51.09          |

## 97 B.4 Additional Experiments

98 **Random In-Context Exemplars** Empirically, selecting in-context exemplars can be critical for the  
99 overall performance of LLMs. Apart from our retrieval-augmented method in main paper Sec. 3, we  
100 also experiment with a **fixed random** set of in-context exemplars. Specifically, we randomly sample  $k$   
101 examples from the training (support) set  $D$  to form a fixed set of in-context demonstrations for all test  
102 conditions  $C_j$ . Therefore, the fixed random setting results in in-context exemplars that are unrelated  
103 to the test condition  $C_j$ . The minor gap between lines 1&5 in Table 3 verifies that LayoutGPT is not  
104 directly copying from the in-context exemplars in most cases. Fig. 2 further justifies the argument  
105 with layout visualization of the most similar in-context exemplars and the LayoutGPT outputs.

106 **Number of In-Context Exemplars** We take a closer look at the effects of the number of in-context  
107 exemplars in the prompt as shown in Table 3. For counting, we observe that the number of exemplars  
108 is positively correlated with the counting accuracy. We conjecture that LLMs learn to make more  
109 accurate predictions for challenging prompts (e.g., comparison) by learning from more few-shot  
110 exemplars. As the layout accuracy also accounts for results where CSS parsing fails, we observe that  
111 the LLMs generate more consistent CSS-style code by learning from more examples. However, we  
112 cannot observe a similar trend in spatial reasoning prompts. We conjecture that LLMs only require as  
113 few as four demonstrations to learn the differences between the four types of spatial relations. The  
114 small optimal number of in-context exemplars implies that LLMs already have 2D spatial knowledge  
115 and can map textual descriptions to corresponding coordinate values. Yet it is important to find a  
116 proper representation to elicit such knowledge from LLMs as implied in main paper Sec. 4.4.

117 **Performance on Numerical Subtasks** Table 4 presents the performance of layout generation in  
118 various numerical reasoning subtasks. Regarding template-based prompts, the LayoutGPT demon-  
119 strates superior performance in the “Single Category” numerical reasoning task, exhibiting precision,  
120 recall, and accuracy values around 86%. However, when it comes to the “Two Category” numerical  
121 reasoning task, while precision and recall experience minimal changes, the accuracy drops to 66%.

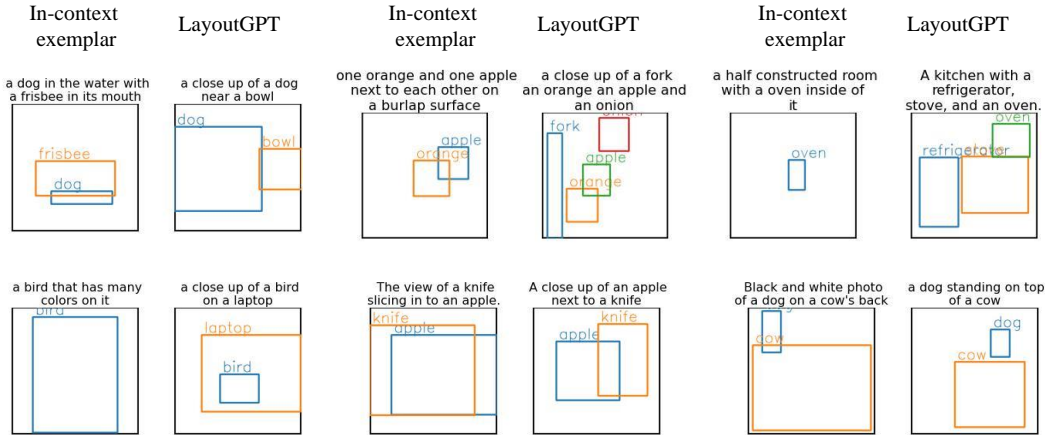

Figure 2: Comparison between the most similar in-context exemplar and the generation results of LayoutGPT.

Table 4: The layout performance on each numerical reasoning subtask. Results reported on LayoutGPT (GPT-4).

| Prompt Source               | Subtask         | Precision | Recall | Accuracy |
|-----------------------------|-----------------|-----------|--------|----------|
| Template                    | Single Category | 85.96     | 85.96  | 85.96    |
|                             | Two Categories  | 85.14     | 85.04  | 66.60    |
|                             | Comparison      | -         | -      | 77.80    |
| Natural Prompts from MSCOCO |                 | 72.08     | 87.1   | 82.79    |
| -                           | Total           | 78.36     | 86.29  | 78.43    |

122 For the “Comparison” subtask, the accuracy hovers around 78%. These outcomes indicate that Lay-  
 123 outGPT encounters greater challenges when confronted with multi-class planning scenarios, whether  
 124 the number of objects is explicitly provided or indirectly implied through comparative clauses.

125 For natural prompts extracted from MSCOCO, a noteworthy observation is the high recall accom-  
 126 panied by relatively lower precision. This discrepancy arises due to the ground truth bounding  
 127 box annotations encompassing only 80 object classes, whereas the natural prompts may mention  
 128 objects beyond the annotated classes. Consequently, our LayoutGPT may predict object layouts  
 129 corresponding to classes not present in the ground truth, which, despite lowering precision, aligns  
 130 with the desired behavior.

131 **Failure cases** Fig. 3 shows typical failure cases in numerical and spatial relations. As previously  
 132 discussed, we observe in Table 4 that numerical prompts that involves two type of objects (“Two  
 133 Categories” and “Comparison”) are more challenging to LayoutGPT and the image generation model.  
 134 In these subtasks, LayoutGPT tends to predict much smaller bounding boxes to fit all objects within  
 135 the limited image space. The small boxes further challenge GLIGEN to fit the object within the  
 136 limited region, as shown in Fig. 3 (right).

### 137 C LayoutGPT for 3D Scene Synthesis

138 Due to the limitation in datasets, the conditions are room type and room size instead of text descrip-  
 139 tions. While ATISS [9] utilizes the floor plan image as the input condition, LLMs are not compatible  
 140 with image inputs. Therefore, we convert the floor plan image into the specification of the room size.  
 141 Therefore, the input conditions are similar to “Room Type: Bedroom, Room Size: max length 256px,  
 142 max width 256px”.

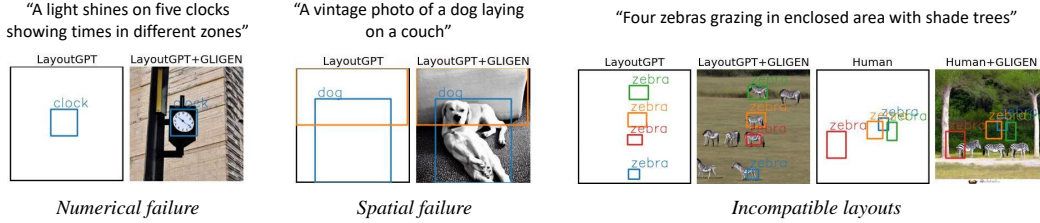

Figure 3: Typical failure cases of LayoutGPT and the generation results using GLIGEN.

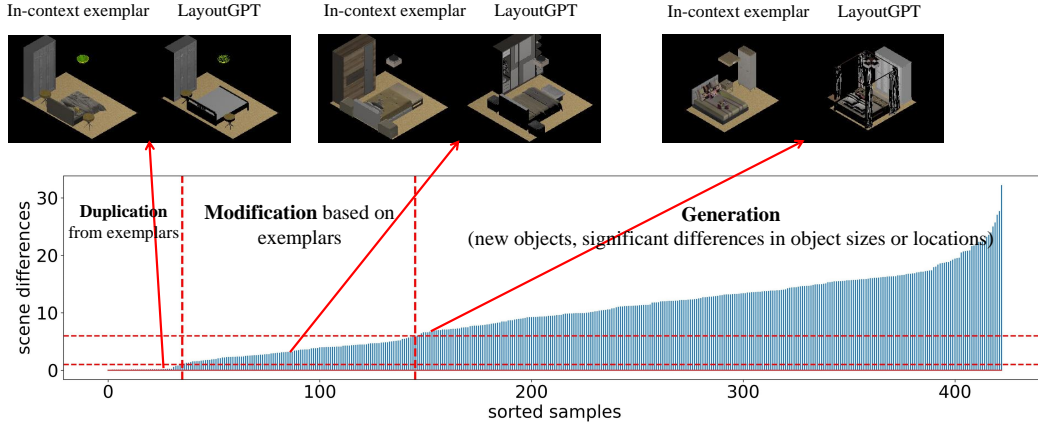

Figure 4: Sorted scene differences between LayoutGPT generated scenes and the most similar in-context exemplars of 423 testing bedroom samples. We partition the distribution into three segments representing different behaviors of LayoutGPT. Duplication: The generated scene is a duplication of the exemplar. Modification: LayoutGPT slightly modifies one exemplar as the generated layout. Generation: LayoutGPT generates novel scenes that are highly different from the exemplars.

### 143 C.1 Exemplar Selection

144 Similar to Sec. B.4, we investigate the effect of using a random set of in-context exemplars for  
 145 indoor scene synthesis. When we apply 8 random bedroom layouts from the training set as in-context  
 146 exemplars, the out-of-bound rate increases from 43.26% in main paper Table 4 to 85.58%. The  
 147 significant differences suggest that LayoutGPT heavily relies on rooms with similar floor plans to  
 148 maintain objects within the boundary. Yet we verify that the generated layouts from LayoutGPT are  
 149 not duplicates of the in-context exemplars in most cases.

150 We first define a training scene layout as a set of objects  $S^t = \{\mathbf{o}_1^t, \dots, \mathbf{o}_m^t\}$ , and a generated scene  
 151 layout as  $S^g = \{\mathbf{o}_1^g, \dots, \mathbf{o}_n^g\}$ . Note that  $\mathbf{o}_j$  consists of category  $\mathbf{c}_j$ , location  $\mathbf{t}_j \in \mathbb{R}^3$ , size  $\mathbf{s}_j \in \mathbb{R}^3$ ,  
 152 and orientation  $\mathbf{r}_j \in \mathbb{R}$ , i.e.  $\mathbf{o}_j = (\mathbf{c}_j, \mathbf{t}_j, \mathbf{s}_j, \mathbf{r}_j)$ . We define the scene difference  $D(\cdot|\cdot)$  between  $S^t$   
 153 and  $S^g$  as

$$D(S^t|S^g) = \sum_{i=1}^n \min_{j, \mathbf{c}_j^g = \mathbf{c}_i^t} (\|\mathbf{t}_j^g - \mathbf{t}_i^t\|_1 + \|\mathbf{s}_j^g - \mathbf{s}_i^t\|_1). \quad (2)$$

154 We set  $\mathbf{t}_j^g, \mathbf{s}_j^g$  to  $\mathbf{0}$  if  $S^g$  does not have a single object that belongs to the same category as  $\mathbf{c}_i^g$ . For  
 155 each testing sample of the bedroom, we compute the scene differences between the generated layout  
 156 and all eight in-context exemplars and use the minimum value as the final scene difference. Note that  
 157 all parameters used for computation are in “meters” instead of “pixels”.

158 We plot the scene differences of all 423 testing samples in Fig. 4. We empirically discover that a  
 159 scene difference below 1.0 means  $S^g$  is highly similar to  $S^t$ , which we conclude as **duplication**  
 160 from in-context exemplars. A scene difference below 6.0 shows moderate differences in object sizes or  
 161 locations between two scenes, representing a **modification** based on  $S^t$  to generate  $S^g$ . Finally, a  
 162 scene difference larger than 6.0 represents new objects or significant differences in object sizes or

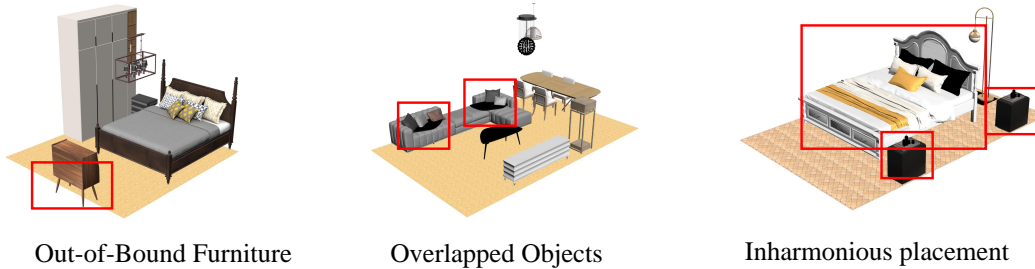

Figure 5: Typical failure cases of LayoutGPT.

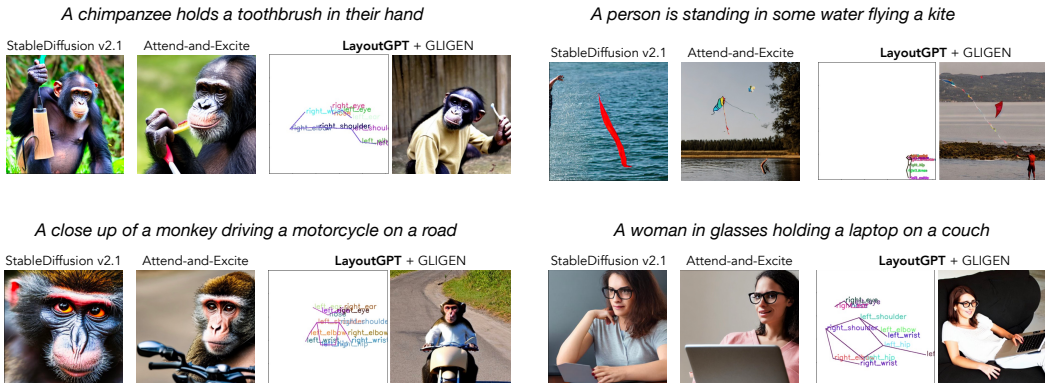

Figure 6: Plausible examples of LayoutGPT(GPT-4) planning keypoints distributions before conducting text-conditioned image generation.

163 locations between the exemplar and the generated layouts, i.e. true **generation**. Fig. 4 shows that  
 164 34/111/278 scenes belong to duplication/modification/generation. Among each category, 30/67/143  
 165 scenes have no out-of-bound furniture. Therefore, LayoutGPT is performing generation instead of  
 166 duplicating in-context exemplars in most cases.

## 167 C.2 Failure Cases

168 While LayoutGPT achieves comparable results as ATISS, LayoutGPT cannot avoid typical failure  
 169 cases as shown in Fig. 5, such as out-of-bound furniture and overlapped objects. Fig. 5 (right) shows  
 170 an incorrect placement of nightstands on the same side of the bed while they are commonly placed on  
 171 each side of the bed headboard. Future work could focus on more sophisticated in-context learning or  
 172 fine-tuning methods to improve the LLMs’ understanding of 3D concepts.

## 173 D LayoutGPT for 2D Keypoint Planning

174 In addition to its application in 2D and 3D layout planning, we investigate the feasibility of leveraging  
 175 LayoutGPT for 2D keypoint planning to facilitate text-conditioned image generation. In this approach,  
 176 we utilize LayoutGPT to predict keypoint distributions based on a given text prompt, and subsequently  
 177 employ GLIGEN [5] for keypoint-to-image generation. The keypoint format used aligns with the  
 178 specifications outlined in MSCOCO2017 [6], focusing on 17 keypoints that correspond to the human  
 179 skeleton. Similar to our methodology for selecting supporting examples in the context of 2D layout  
 180 planning (Section B), we retrieve the  $k$ -most similar examples from the training set of MSCOCO2017  
 181 and utilize these examples to provide keypoint distributions as input to GPT-3.5/4. Table 5 presents  
 182 an illustrative example of the input format employed for keypoint planning with GPT-3.5.

183 Fig. 6 presents several illustrative examples that compare the images generated by conditioning on key-  
 184 points planned by our LayoutGPT with those generated by end-to-end models such as StableDiffusion-  
 185 v2.1 [10] and Attend-and-Excite [1]. In this preliminary demonstration, we observe that LayoutGPT

Table 5: The prompting input provided to GPT-3.5 for LayoutGPT keypoint planning.

Instruction:

Given a sentence prompt that will be used to generate an image, plan skeleton keypoints layout of the mentioned objects. The skeleton keypoints include the following 17 nodes: nose, left\_eye, right\_eye, left\_ear, right\_ear, left\_shoulder, right\_shoulder, left\_elbow, right\_elbow, left\_wrist, right\_wrist, left\_hip, right\_hip, left\_knee, right\_knee, left\_ankle, right\_ankle. The generated keypoints layout should follow the CSS style, where each line starts with the keypoint node name and is followed by its absolute position.

Formally, each line should be like "node\_name {left: ?px; top: ?px; }". Please follow this format strictly. Do not display in other variation of formats. Notice that some keypoint nodes may not be visible on the canvas. In such cases, simply put "node\_name {left: 0px; top: 0px; }" for the invisible nodes. The image is 64px wide and 64px high. Therefore, all properties of the positions should not exceed 64px.

Prompt: a man on a surfboard in a river near a couple of trees and branches

Keypoints:

person#1:

```
nose {left: 36px; top: 33px; }
left_eye {left: 36px; top: 33px; }
right_eye {left: 36px; top: 33px; }
left_ear {left: 37px; top: 33px; }
right_ear {left: 0px; top: 0px; }
left_shoulder {left: 38px; top: 34px; }
right_shoulder {left: 36px; top: 35px; }
left_elbow {left: 35px; top: 34px; }
right_elbow {left: 35px; top: 38px; }
left_wrist {left: 33px; top: 32px; }
right_wrist {left: 33px; top: 39px; }
left_hip {left: 39px; top: 39px; }
right_hip {left: 37px; top: 40px; }
left_knee {left: 38px; top: 44px; }
right_knee {left: 37px; top: 44px; }
left_ankle {left: 39px; top: 49px; }
right_ankle {left: 37px; top: 48px; }
```

[MORE SUPPORTING EXAMPLES]

Prompt: a man leaning on a surfboard in the water riding a wave

Keypoints:

186 exhibits promising potential in offering inherent control over specific movements or actions through  
187 keypoint planning.

188 Nevertheless, it is worth noting that keypoints planning presents considerably greater challenges  
189 compared to bounding box layout planning, attributable to several evident factors. Firstly, keypoints  
190 planning necessitates the prediction of the positions of 17 nodes, which is significantly more complex  
191 than the 2D layout planning involving four aspects or the 3D layout planning encompassing seven  
192 aspects. Secondly, the distribution of keypoints encompasses a much larger array of spatial relations  
193 due to the numerous possible body movements. In contrast, previous 2D layout planning tasks only  
194 involve four types of spatial relations. These inherent complexities render keypoint planning heavily  
195 reliant on in-context demonstrations. However, the limited availability of annotations pertaining to  
196 body movements in the MSCOCO dataset further exacerbates the challenges associated with reliable  
197 keypoint planning. Therefore, we leave the exploration of this potential direction to future research  
198 endeavors.

## 199 E Ethical Statement

200 In addition to the layouts predicted by GPT-3.5/4, we also incorporate human-planned layouts as a  
201 natural baseline for comparative analysis. To facilitate this, we provide annotators with an interface  
202 featuring a blank square space where they can draw bounding boxes. Alongside the input text prompt,  
203 we also present the noun words or phrases from the prompt to human annotators, instructing them  
204 to draw a bounding box for each corresponding element. We intentionally refrain from imposing  
205 additional constraints, enabling annotators to freely exercise their imagination and create layouts  
206 based on their understanding of reasonable object arrangements. To compensate annotators for their



207 efforts, we offer a payment rate of \$0.2 US dollars per Human Intelligence Task (HIT). The average  
208 completion time of approximately 30 seconds per HIT, which corresponds to an average hourly  
209 payment rate of \$24.

## 210 **F Limitations**

211 The current work has several limitations that provide opportunities for future research. Firstly,  
212 while this work focuses on 2D and 3D bounding box layouts and makes a preliminary attempt at  
213 keypoints, there exist various other methods for providing additional spatial knowledge in image/scene  
214 generation, such as segmentation masks and depth maps. Future work could explore integrating  
215 LLMs with these alternative visual control mechanisms to broaden the scope of visual planning  
216 capabilities. Secondly, the current work primarily addresses visual generation tasks and lacks a unified  
217 framework for handling other visual tasks like classification or understanding. Extending the proposed  
218 framework to encompass a wider range of visual tasks would provide a more comprehensive and  
219 versatile solution. Thirdly, this work is a downstream application that attempts to distill knowledge  
220 from LLMs’ extensive knowledge bases. Future research could explore more fundamental approaches  
221 that directly enhance the visual planning abilities of various visual generation models. By developing  
222 specialized models that are explicitly designed for visual planning, it may be possible to achieve  
223 more refined and dedicated visual generation outcomes. Overall, while the current work demonstrates  
224 the potential of using LLMs for visual planning, there are avenues for future research to address the  
225 aforementioned limitations and further advance the field of visual generation and planning.

## 226 **G Broader Impact**

227 The utilization of LLMs for conducting visual planning in compositional 2D or 3D generation has  
228 significant broader impacts. Firstly, LLMs alleviate the burden on human designers by simplifying the  
229 complex design process. This not only enhances productivity but also facilitates scalability, as LLMs  
230 can efficiently handle large-scale planning tasks. Secondly, LLMs exhibit remarkable capabilities in  
231 achieving fine-grained visual control. By conditioning on textual inputs, LLMs can easily generate  
232 precise and detailed instructions for the desired visual layout, allowing for precise composition and  
233 arrangement of elements. Moreover, LLMs bring a wealth of commonsense knowledge into the  
234 planning process. With access to vast amounts of information, LLMs can incorporate this knowledge  
235 to ensure more accurate and contextually coherent visual planning. This integration of commonsense  
236 knowledge enhances the fidelity of attribute annotations and contributes to more reliable and realistic  
237 visual generation outcomes.

238 It is worth noting that this work represents an initial foray into the realm of visual planning using  
239 LLMs, indicating the potential for further advancements and applications in this area. As research  
240 in this field progresses, we can anticipate the development of more sophisticated and specialized  
241 visual planning techniques, expanding the scope of LLMs’ contribution to diverse domains, such as  
242 architecture, virtual reality, and computer-aided design.

## 243 **H Additional Qualitative Examples**

244 We present additional visual showcases to demonstrate the capabilities of LayoutGPT in different  
245 contexts. Fig. 7 showcases examples related to 2D numerical reasoning, Fig. 8 illustrates examples of  
246 2D spatial reasoning, and Fig. 9 displays examples of 3D scene synthesis. These showcases offer  
247 further insights into the effectiveness and versatility of our approach across various domains.

## 248 **References**

- 249 [1] Hila Chefer, Yuval Alaluf, Yael Vinker, Lior Wolf, and Daniel Cohen-Or. Attend-and-  
250 excite: Attention-based semantic guidance for text-to-image diffusion models. *arXiv preprint*  
251 *arXiv:2301.13826*, 2023. 7
- 252 [2] Mark Chen, Jerry Tworek, Heewoo Jun, Qiming Yuan, Henrique Ponde, Jared Kaplan, Harrison  
253 Edwards, Yura Burda, Nicholas Joseph, Greg Brockman, Alex Ray, Raul Puri, Gretchen  
254 Krueger, Michael Petrov, Heidy Khlaaf, Girish Sastry, Pamela Mishkin, Brooke Chan, Scott

- 255 Gray, Nick Ryder, Mikhail Pavlov, Alethea Power, Lukasz Kaiser, Mohammad Bavarian,  
256 Clemens Winter, Philippe Tillet, Felipe Petroski Such, David W. Cummings, Matthias Plappert,  
257 Fotios Chantzis, Elizabeth Barnes, Ariel Herbert-Voss, William H. Guss, Alex Nichol, Igor  
258 Babuschkin, S. Arun Balaji, Shantanu Jain, Andrew Carr, Jan Leike, Joshua Achiam, Vedant  
259 Misra, Evan Morikawa, Alec Radford, Matthew M. Knight, Miles Brundage, Mira Murati, Katie  
260 Mayer, Peter Welinder, Bob McGrew, Dario Amodei, Sam McCandlish, Ilya Sutskever, and  
261 Wojciech Zaremba. Evaluating large language models trained on code. *ArXiv*, abs/2107.03374,  
262 2021. [2](#)
- 263 [3] Jaemin Cho, Abhay Zala, and Mohit Bansal. Dall-eval: Probing the reasoning skills and social  
264 biases of text-to-image generative transformers. *arXiv preprint arXiv:2202.04053*, 2022. [2](#)
- 265 [4] Liunian Harold Li, Pengchuan Zhang, Haotian Zhang, Jianwei Yang, Chunyuan Li, Yiwu  
266 Zhong, Lijuan Wang, Lu Yuan, Lei Zhang, Jenq-Neng Hwang, et al. Grounded language-image  
267 pre-training. In *Proceedings of the IEEE/CVF Conference on Computer Vision and Pattern  
268 Recognition*, pages 10965–10975, 2022. [3](#)
- 269 [5] Yuheng Li, Haotian Liu, Qingyang Wu, Fangzhou Mu, Jianwei Yang, Jianfeng Gao, Chunyuan  
270 Li, and Yong Jae Lee. Gligen: Open-set grounded text-to-image generation. *2023 IEEE/CVF  
271 Conference on Computer Vision and Pattern Recognition (CVPR)*, 2023. [7](#)
- 272 [6] Tsung-Yi Lin, Michael Maire, Serge Belongie, James Hays, Pietro Perona, Deva Ramanan, Piotr  
273 Dollár, and C Lawrence Zitnick. Microsoft coco: Common objects in context. In *Computer  
274 Vision—ECCV 2014: 13th European Conference, Zurich, Switzerland, September 6-12, 2014,  
275 Proceedings, Part V 13*, pages 740–755. Springer, 2014. [7](#)
- 276 [7] OpenAI. Gpt-4 technical report. *arXiv preprint arXiv:2303.08774*, 2023. [2](#)
- 277 [8] Long Ouyang, Jeff Wu, Xu Jiang, Diogo Almeida, Carroll L. Wainwright, Pamela Mishkin,  
278 Chong Zhang, Sandhini Agarwal, Katarina Slama, Alex Ray, John Schulman, Jacob Hilton,  
279 Fraser Kelton, Luke E. Miller, Maddie Simens, Amanda Askell, Peter Welinder, Paul Francis  
280 Christiano, Jan Leike, and Ryan J. Lowe. Training language models to follow instructions with  
281 human feedback. *ArXiv*, abs/2203.02155, 2022. [2](#)
- 282 [9] Despoina Paschalidou, Amlan Kar, Maria Shugrina, Karsten Kreis, Andreas Geiger, and Sanja  
283 Fidler. Atiss: Autoregressive transformers for indoor scene synthesis. *Advances in Neural  
284 Information Processing Systems*, 34:12013–12026, 2021. [5](#)
- 285 [10] Robin Rombach, A. Blattmann, Dominik Lorenz, Patrick Esser, and Björn Ommer. High-  
286 resolution image synthesis with latent diffusion models. *2022 IEEE/CVF Conference on  
287 Computer Vision and Pattern Recognition (CVPR)*, pages 10674–10685, 2021. [7](#)

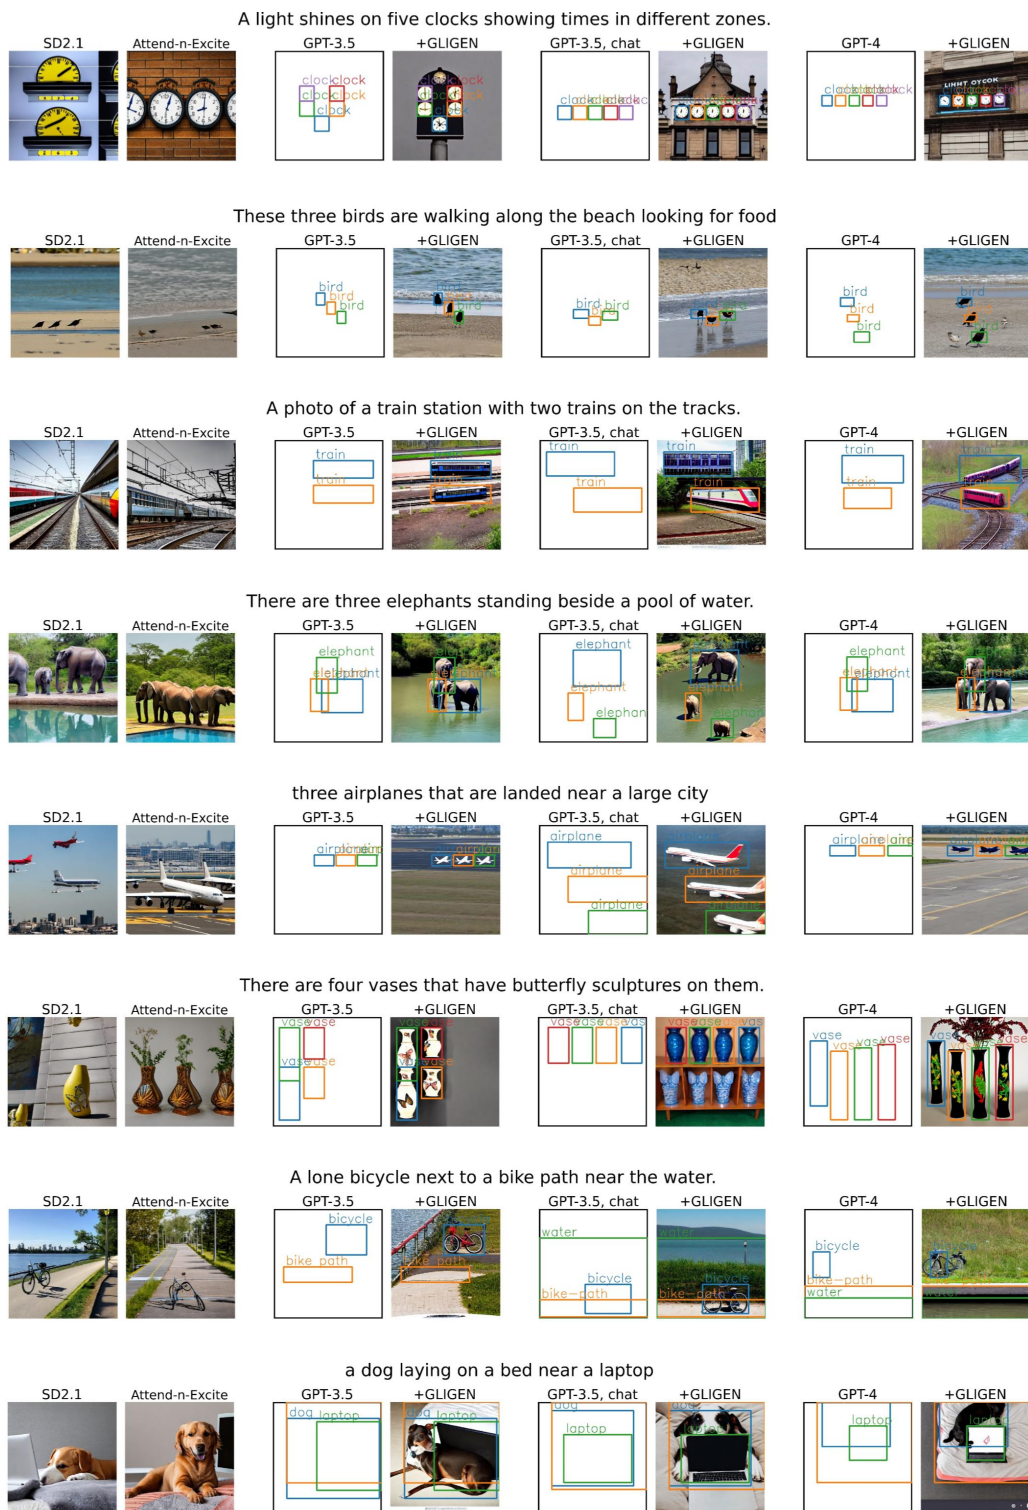

Figure 7: Qualitative examples of variants of LayoutGPT on numerical reasoning prompts.

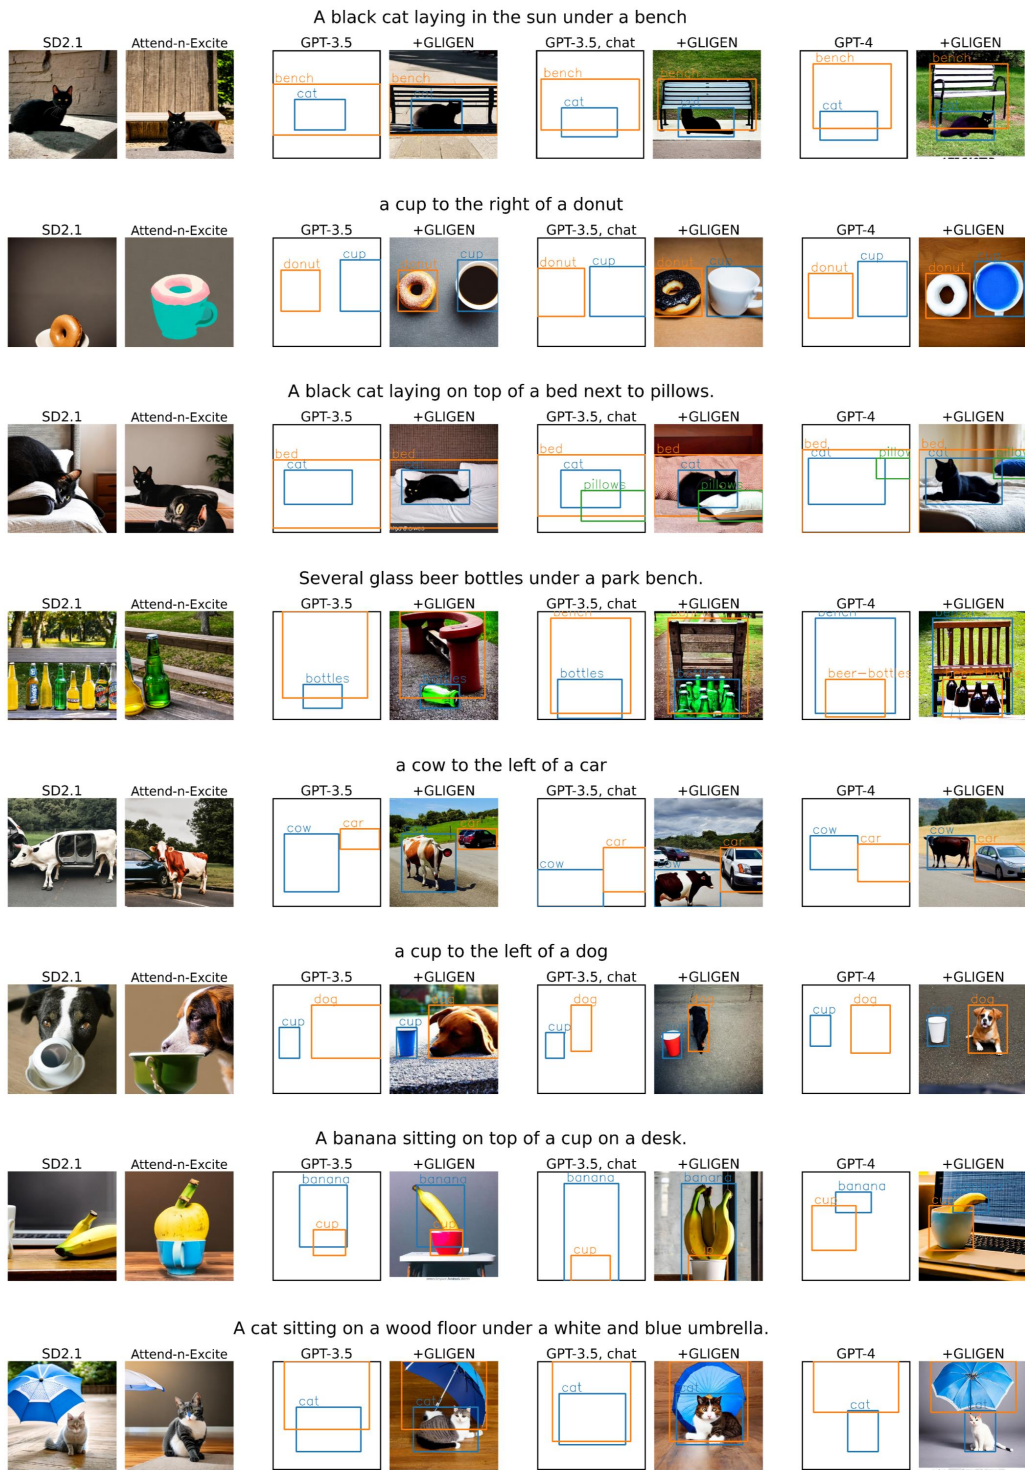

Figure 8: Qualitative examples of variants of LayoutGPT on spatial reasoning prompts.

GPT-3.5

GPT-3.5-chat

GPT-4

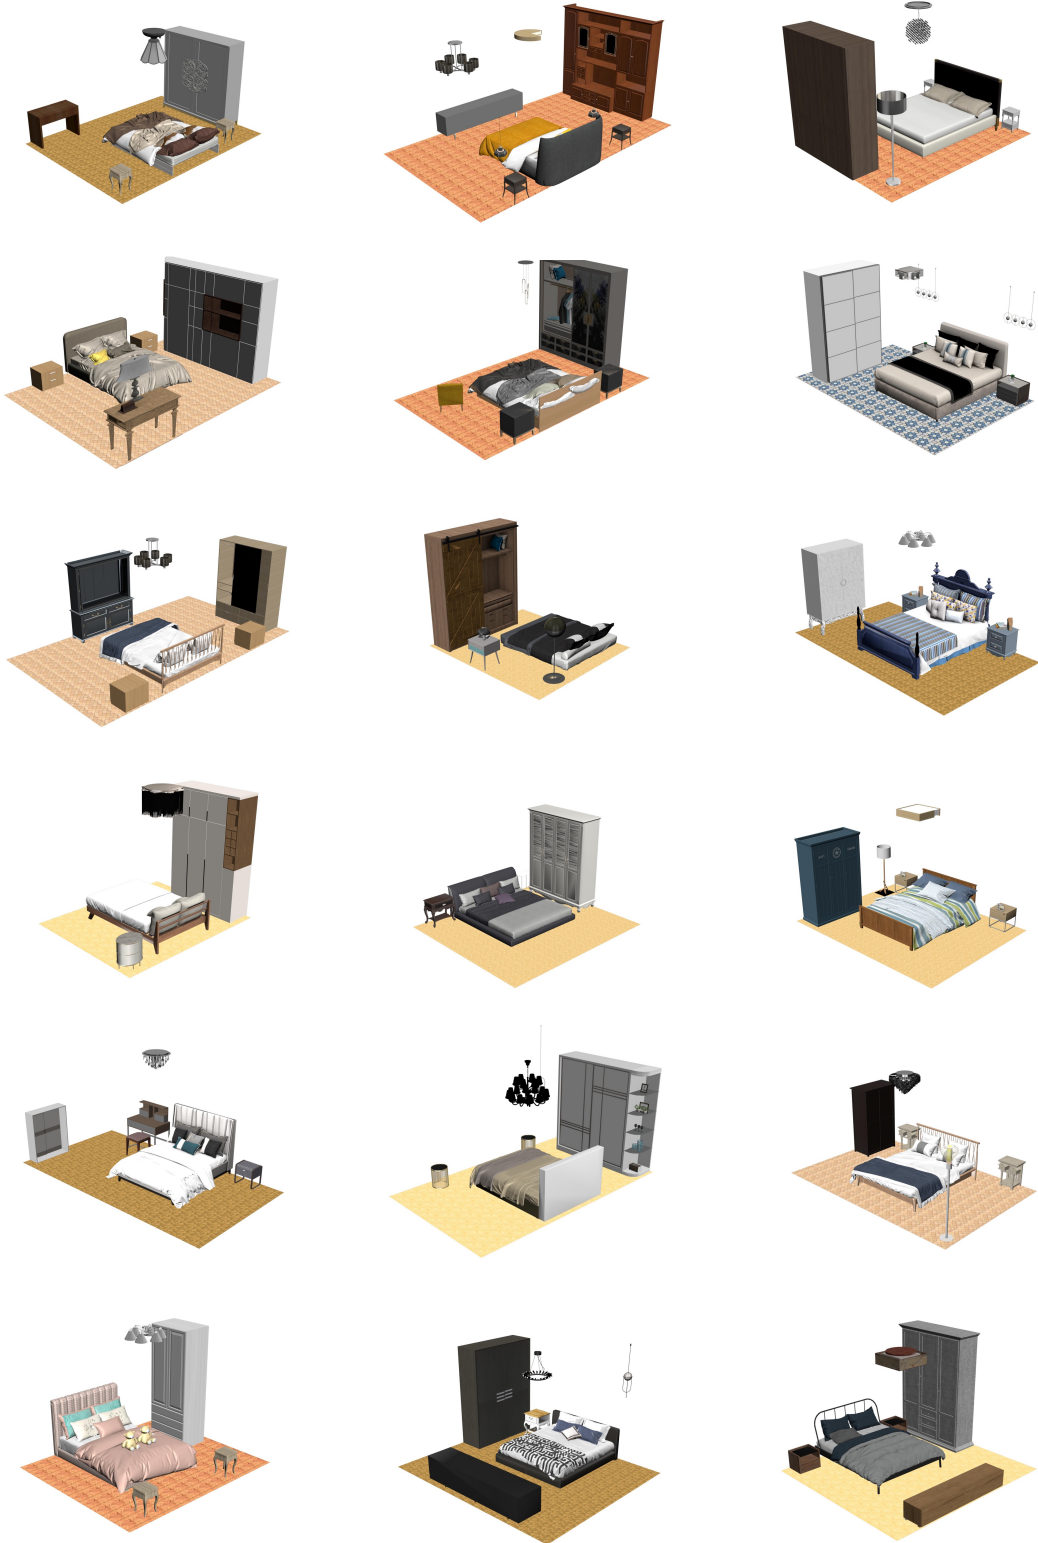

Figure 9: Additional qualitative examples of variants of LayoutGPT in bedroom scene synthesis.
